# Supplementary material for: The construction of MRI brain/head templates for Chinese children from 7 to 16 years of age
Source: PubMed Central journal article supplement — Dev Cogn Neurosci. 2015 Aug 28;15:94–105. doi: 10.1016/j.dcn.2015.08.008 (PMC4714595; doi:10.1016/j.dcn.2015.08.008), 2015-08-28

## Supplemental Information

### Root mean square (RMS) results for the iterative templates construction

Information regarding the outcome of the iterative process for templates construction was shown in Supplemental Figure 1. It shows the change in age-specific templates fits with each successive iteration. This was calculated as the RMS difference between the current iteration to the product from the previous iteration. The RMS difference measured the intensity difference between successive iterations at each voxel. Each line in Supplemental Figure 1 represents results for one age-specific template average iteration process. The RMS values for the T1W brain and head iterations decrease from the beginning of the iteration process. After 5 to 6 iterations the RMS for the brain and head templates iterations converges to a minimum level (Figure 1A, 1B). After one iteration with low resolution (50 x 0 x 0) and one iteration at intermediate resolution (50 x 50 x 0) few additional high resolution (50 x 50 x 50) iterations were needed to reach asymptotic RMS for all age groups.

Supplemental Figure 1.

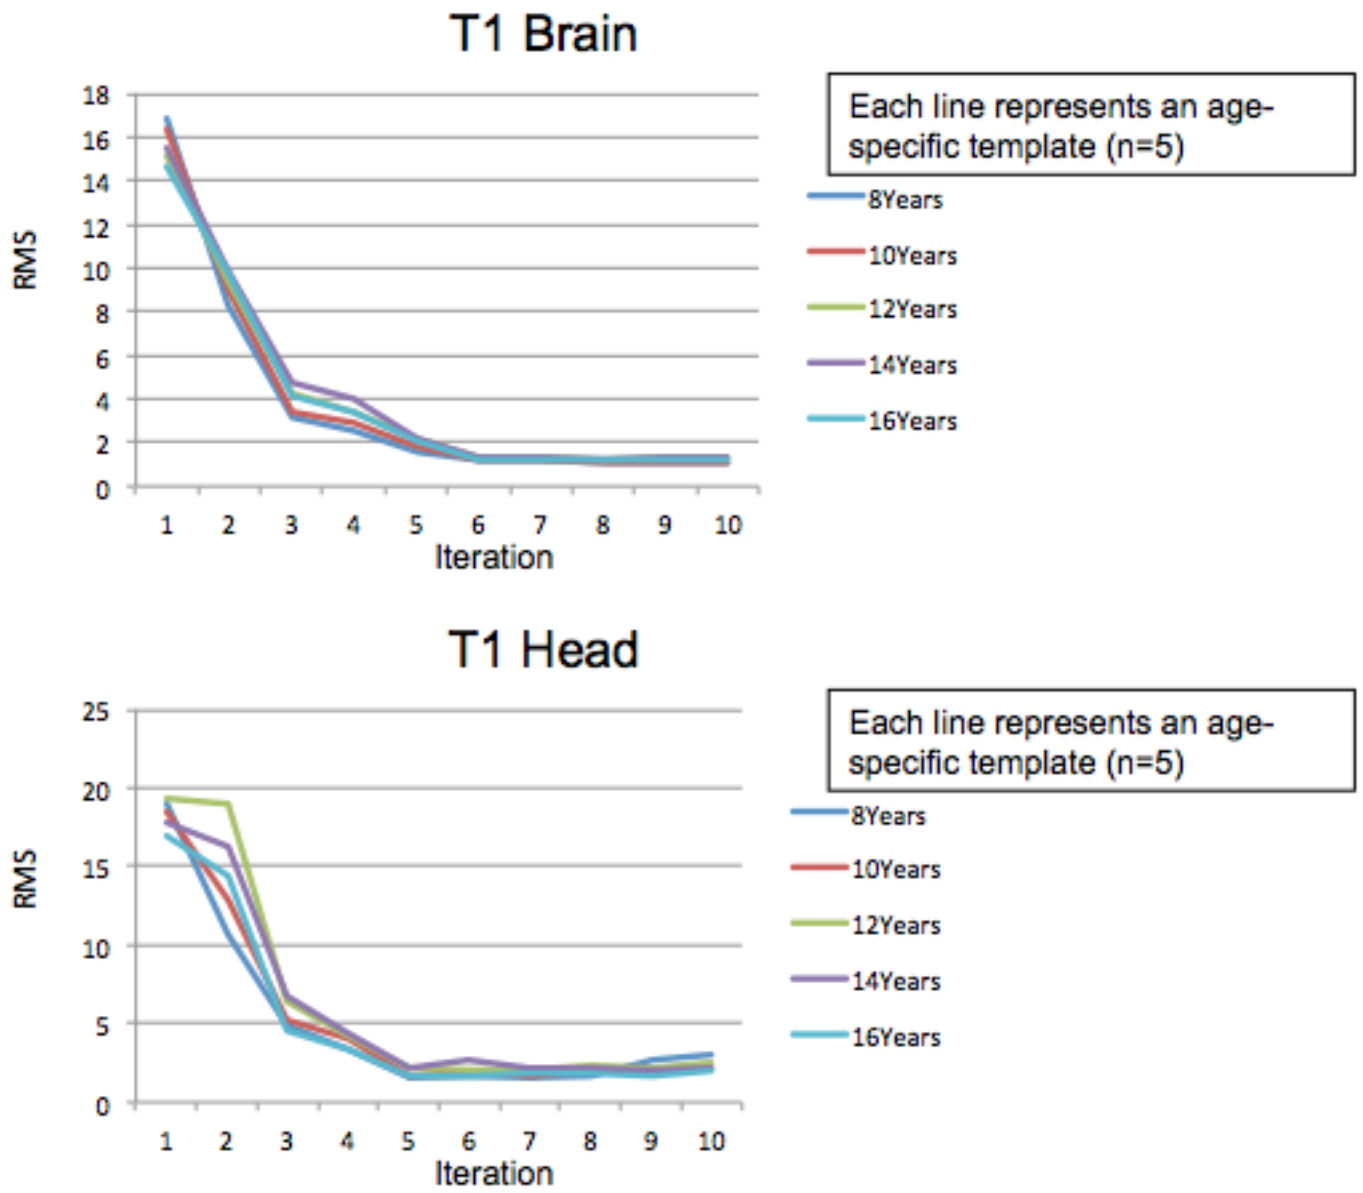

Supplement: NIHMS747950-supplement-Supplemental_Information.pdf [file NIHMS747950-supplement-Supplemental_Information.pdf]
